# Supplementary material
Source: Springer Nature journal article supplement (https://www.springermedizin.de/resource/supplementary/12936_2012_2734_MOESM4_ESM.pdf/9545058)

# Predicted Risk

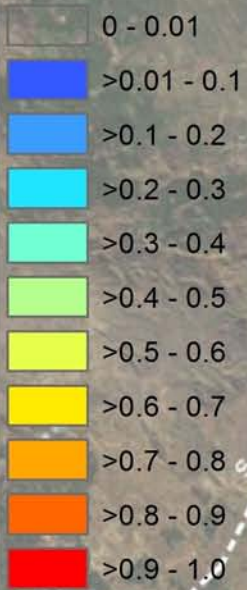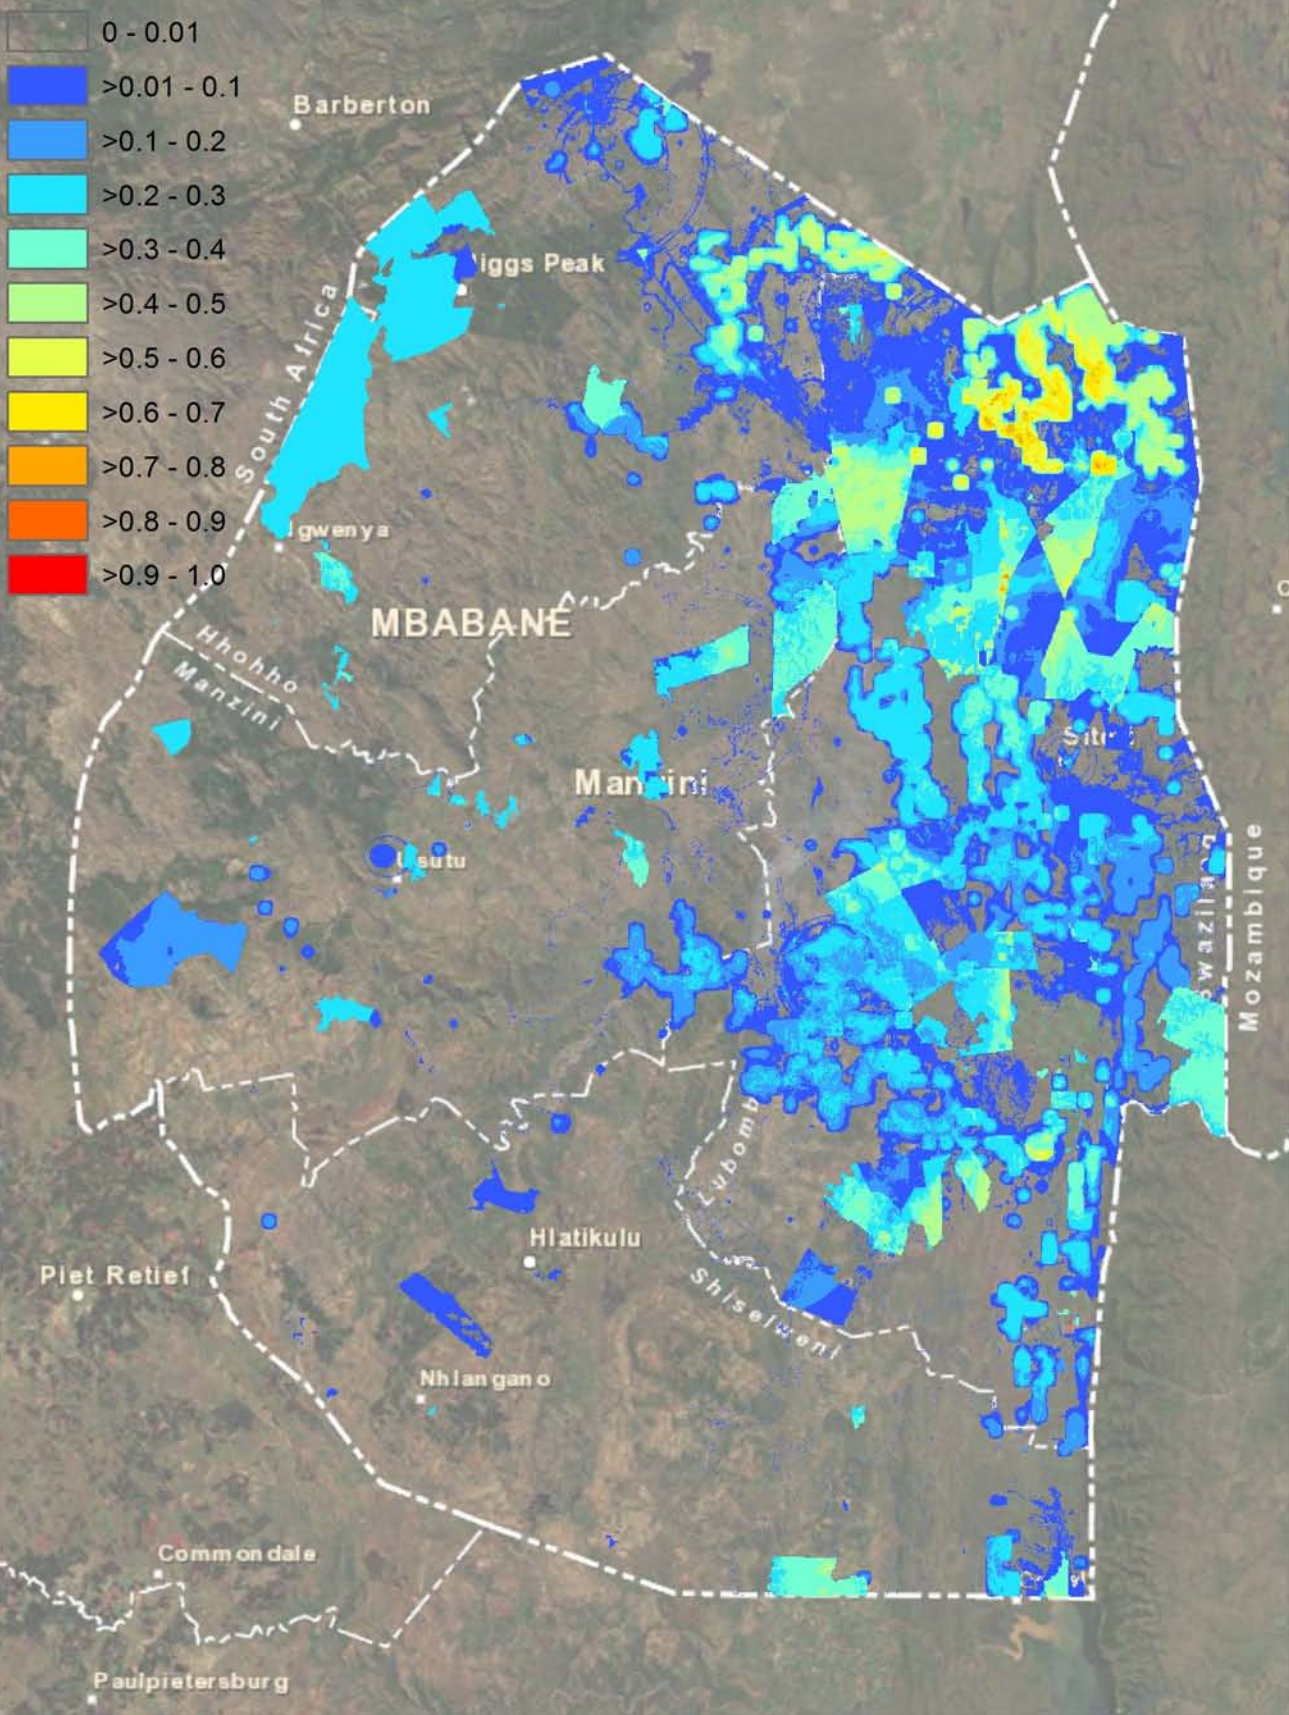

Supplement: MOESM4 [file 9545058]
